# Supplementary material for: Gene Targeting to the Cerebral Cortex Following Intranasal Administration of Polyplexes
Source: MDPI journal article supplement (doi:10.3390/pharmaceutics14061136), 2022-05-26
Supplement: s1 [file s1]

## Supplementary Information

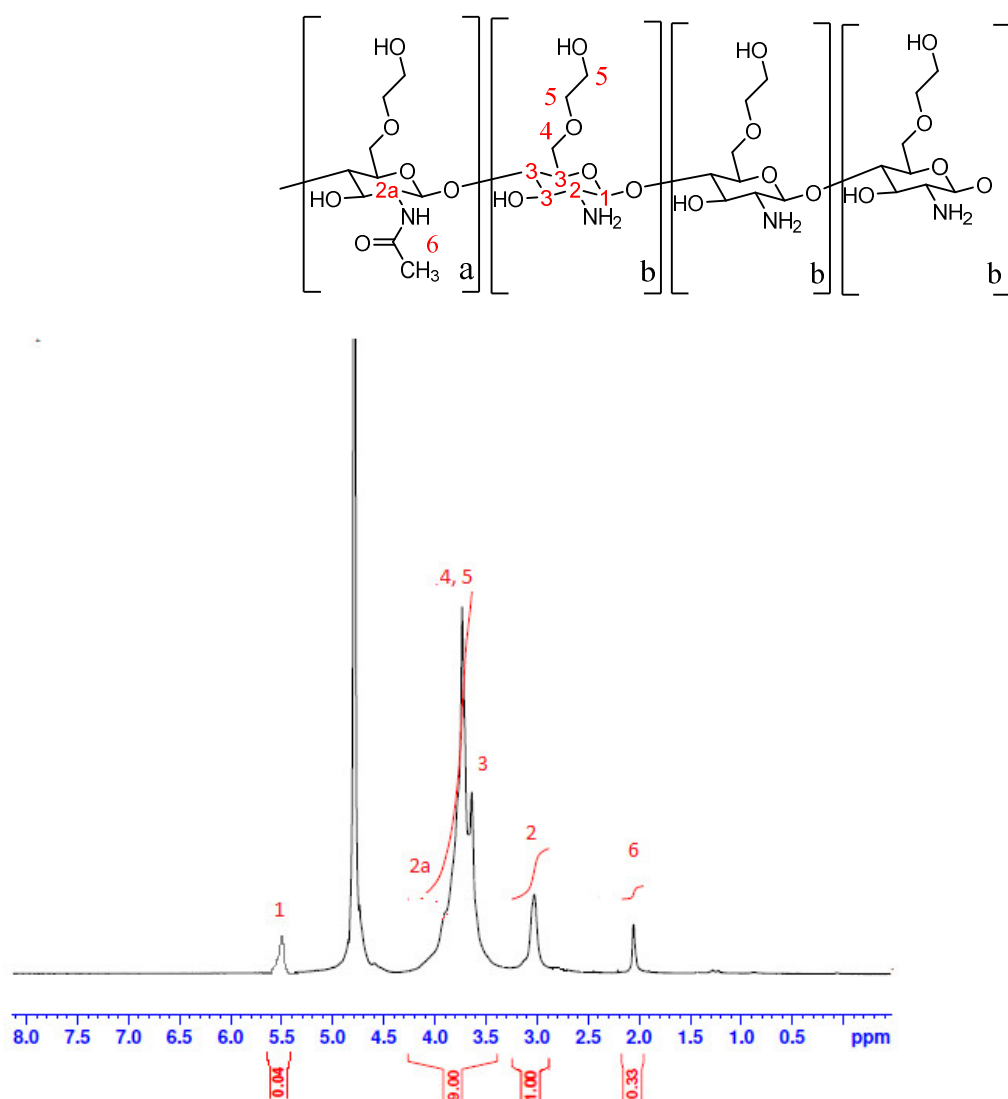

**Figure S1:** Degraded GC37  $^1\text{H}$ -NMR ( $\text{D}_2\text{O}$ ):  $\delta_{2.1}=[\text{CH}_3\text{-CO-NH-}]$ ,  $\delta_{2.9-3.2}=[\text{-CH-(OH)-CH-(NH}_2\text{)}]$ ,  $\delta_{3.4-4.2}=[\text{-CH(OH), -CH}_2\text{(OH) and -CH-(OH)-CH-NH-CO-}]$ ,  $\delta_{4.79}=[\text{D}_2\text{O}]$ ,  $\delta_{5.5}=[\text{-O-CH-O-}]$ .

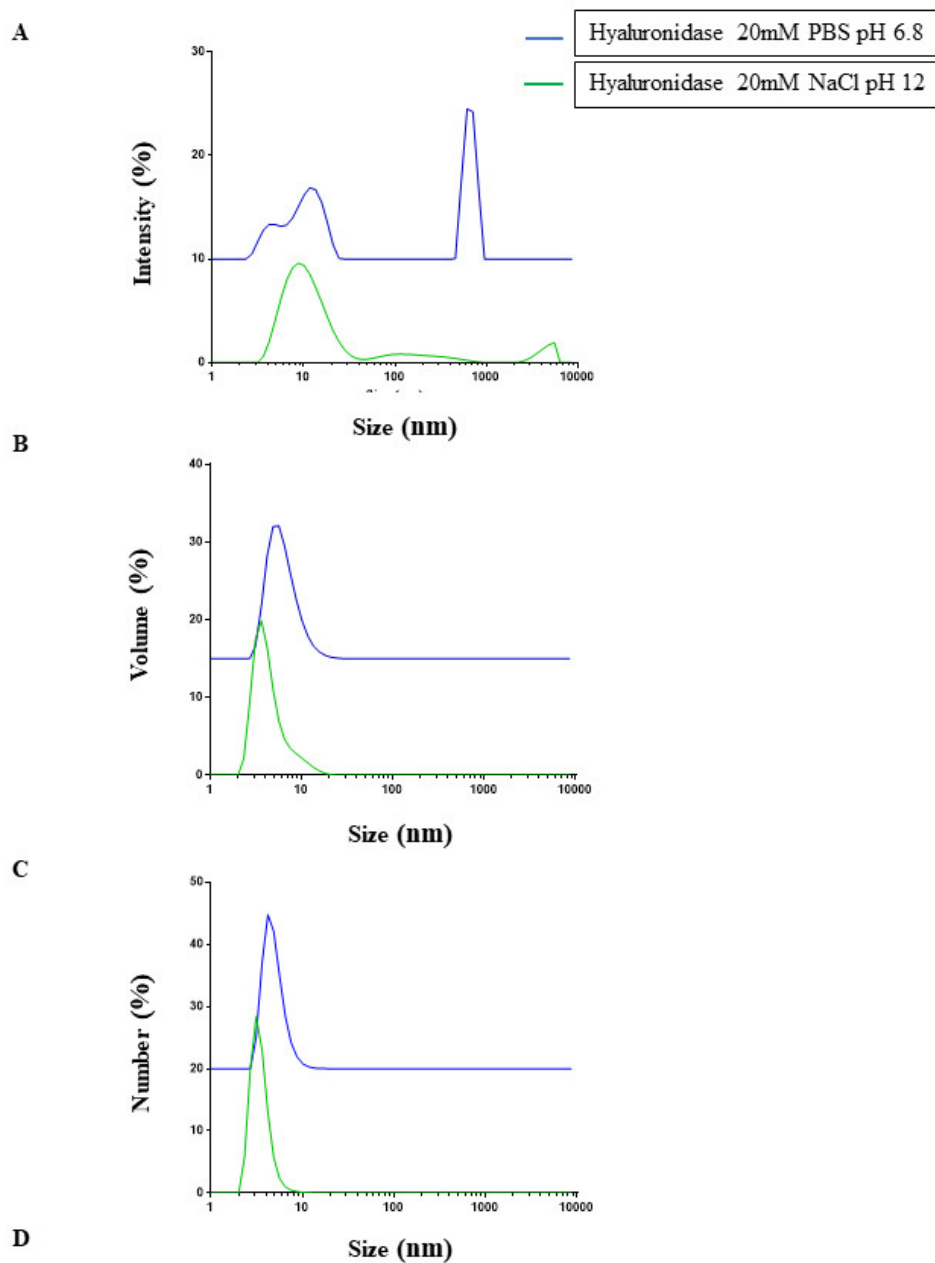

**Figure S2:** Size distribution plots of hyaluronidase by intensity (**A**), volume (**B**) and number (**C**) in 20 mM PBS, pH=6.8 (blue plots) and 20 mM NaCl pH=12 (green plots). (**D**) Size, PDI and zeta potential of hyaluronidase in 20mM PBS, pH=6.8 and 10mM NaCl, pH=12. The data is representative of three independent experiments (Mean  $\pm$  SD, n=3)

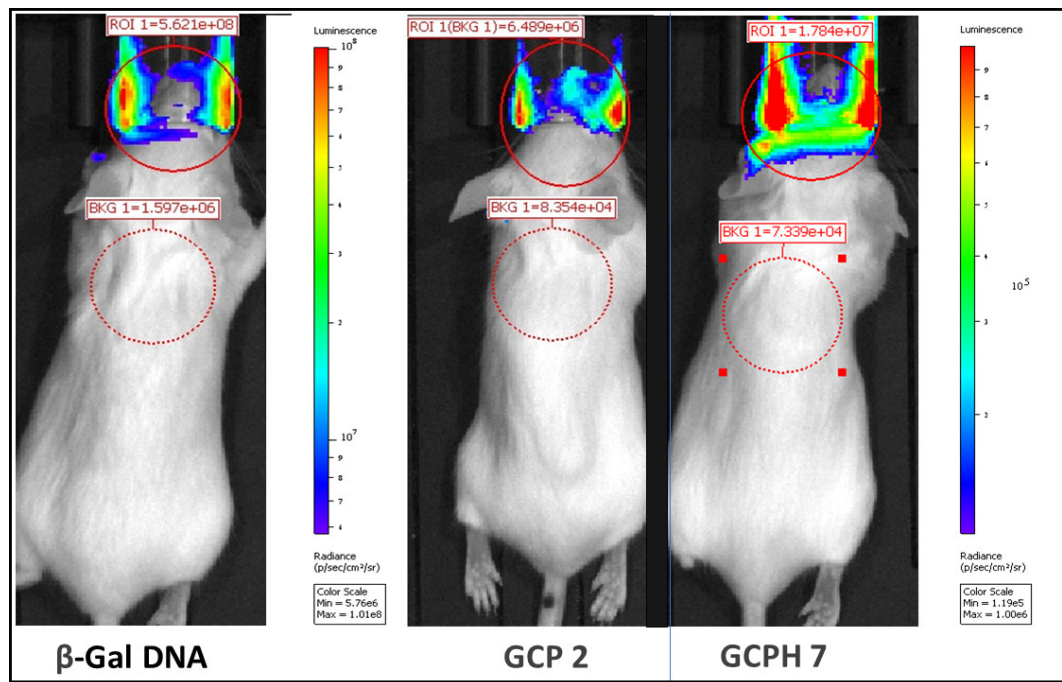

**Figure S3.** Representative IVIS images 24 h post intranasal administration of polyplexes and 15 mins post intranasal administration of the substrate at  $\beta$ -Gal DNA concentration of  $84 \mu\text{g mL}^{-1}$  or  $0.067 \text{ mg kg}^{-1}$ . The signal intensity is very strong and so it appears to bleed out from the animals for the exposure time of 240s.
